# Supplementary material
Source: PubMed Central journal article supplement (PMC4088978)
Supplement: pro0023-0940-SD1.pdf [file pro0023-0940-SD1.pdf]

**Supplemental Table I.** Measured affinities for designed peptides at 37 °C.  $K_d$  units are nanomolar. If repeated experiments were performed, the  $K_d$  listed is the average value and individual replicates are given in parentheses. A  $K_d$  in italics denotes the average with a single outlier removed. A “\*” denotes a fitted  $K_d$  with  $R^2$  value < 0.8.

|           | anti-CREBZF                         | anti-XBP1                        | OPTanti-XBP1_A                        | OPTanti-XBP1_B                    | anti-ATF6                                             | OPTanti-ATF6                                              | anti-FOS                            | OPTanti-FOS                    |
|-----------|-------------------------------------|----------------------------------|---------------------------------------|-----------------------------------|-------------------------------------------------------|-----------------------------------------------------------|-------------------------------------|--------------------------------|
| FOS       | 1015.6                              | 83.5                             | 2949.8                                | 5000                              | ≥5000                                                 | ≥5000                                                     | ≤1 (≤1, ≤1) <sup>1</sup>            | ≤1 (≤1, ≤1) <sup>1</sup>       |
| FOSL1     | 39.5*                               | ≥5000 (≥5000, 5000) <sup>1</sup> | ≥5000 (≥5000, 5000) <sup>1</sup>      | 5000                              | ≥5000                                                 | ≥5000                                                     | 6.0                                 | 2.8                            |
| ATF2      | ≥5000                               | ≥5000 (≥5000, 5000) <sup>1</sup> | ≥5000                                 | ≥5000                             | 5000 (5000, 5000) <sup>1</sup>                        | ≥5000                                                     | 5000 (5000, 5000) <sup>1</sup>      | 400.1                          |
| ATF3      | ≥5000                               | ≥5000                            | ≥5000                                 | ≥5000 (≥5000, 5000) <sup>1</sup>  | 5000                                                  | ≥5000                                                     | 300.3                               | 269.5 (392.6) <sup>2</sup>     |
| ATF4      | 5000                                | ≥5000                            | ≥5000 (≥5000, ≥5000) <sup>1</sup>     | ≥5000                             | ≥5000 (705.7, 5000, ≥5000, ≥5000, ≥5000) <sup>1</sup> | ≥5000 (5000, 5000, 5000, ≥5000) <sup>1</sup>              | (626.7, 5000) <sup>1</sup>          | 30.5                           |
| ATF6      | 1250.7 (746.1, 1755.2) <sup>1</sup> | ≥5000                            | ≥5000 (≥5000, 5000) <sup>1</sup>      | ≥5000                             | 5000 (103.1, 5000, 5000, 5000, 5000) <sup>1</sup>     | 13.4 (17.4, 12.4, 11.5, 12.2) <sup>1</sup> (149.5)        | ≥5000                               | ≥5000                          |
| ATF6B     | 244.7                               | 5000                             | 71.4 (77.7, 65.1) <sup>1</sup>        | 5000                              | 335.2 (246.3, 378.9, 380.4) <sup>1</sup>              | 2.9 (5.7, 1.7, 1.3) <sup>1</sup> (7.4) <sup>2</sup>       | ≥5000                               | ≥5000                          |
| CREBZF    | 1.2 (1.4, 1.0) <sup>1</sup>         | ≥5000                            | ≥5000                                 | ≤1                                | 5000 (5000) <sup>2</sup>                              | 521.3 (274.8, 767.8) <sup>1</sup>                         | ≥5000                               | ≥5000                          |
| XBP1      | ≥5000                               | 5000 (5000, 5000) <sup>1</sup>   | 91.1 (56.4, 85.4, 131.5) <sup>1</sup> | 146.7 (181.4, 112.0) <sup>1</sup> | 4098.9 (342.7, 1395.5, 5000, 5000, 5000) <sup>1</sup> | 6.4 (9.5, 4.2, 6.6, 5.3) <sup>1</sup> (34.6) <sup>2</sup> | ≥5000                               | ≥5000                          |
| JUN       | 661.8 (698.5, 625.1) <sup>1</sup>   | 5000                             | ≥5000 (5000, ≥5000) <sup>1</sup>      | ≥5000                             | ≥5000 (412.8, 5000, ≥5000, ≥5000) <sup>1</sup>        | ≥5000                                                     | 74.0                                | 25.8                           |
| JUNB      | ≥5000                               | 5000                             | ≥5000                                 | ≤1 (≤1, ≤1) <sup>1</sup>          | ≥5000                                                 | ≥5000                                                     | ≥5000                               | ≥5000                          |
| MAFF      | ≥5000                               | ≥5000                            | 5000                                  | 1.8                               | 4250.3                                                | ≥5000                                                     | 245.0                               | 35.6                           |
| MAFG      | 1474.9                              | ≥5000                            | 5000                                  | ≤1                                | 4177.9 (3355.8, 5000) <sup>1</sup>                    | ≥5000                                                     | 134.5                               | 88.1 (322.0) <sup>2</sup>      |
| MAF       | ≥5000                               | 5000                             | ≥5000                                 | ≥5000                             | ≥5000                                                 | ≥5000                                                     | 273.5                               | 34.9                           |
| MAFB      | ≥5000                               | 5000                             | ≥5000                                 | ≥5000                             | ≥5000                                                 | ≥5000                                                     | 1231.2                              | 65.5                           |
| CREB1     | ≥5000                               | 5000                             | ≥5000                                 | ≥5000                             | ≥5000                                                 | ≥5000                                                     | 225.7                               | 79.8                           |
| CREB3     | ≥5000                               | ≥5000                            | 5000                                  | ≥5000                             | 1704.7                                                | ≥5000                                                     | ≥5000                               | ≥5000                          |
| CREB3L1   | ≥5000                               | 663.9                            | ≥5000                                 | ≥5000                             | ≥5000                                                 | ≥5000                                                     | ≥5000                               | ≥5000                          |
| CREB3L3   | ≥5000                               | 5000                             | ≥5000                                 | ≥5000                             | 5000                                                  | ≥5000                                                     | 5000 (1.1, 5000, 5000) <sup>1</sup> | ≥5000                          |
| NFE2      | 763.0                               | 171.3                            | ≥5000                                 | 8.5                               | 687.2                                                 | ≥5000                                                     | 5000                                | ≥5000                          |
| NFE2L1    | 4911.5 (4822.9, 5000) <sup>1</sup>  | ≥5000                            | ≥5000                                 | ≤1                                | 5000 (403.1, 5000, 5000) <sup>1</sup>                 | ≥5000                                                     | ≥5000                               | ≥5000                          |
| NFE2L2    | 2434.4                              | 5000                             | ≥5000                                 | 3714.7*                           | ≥5000                                                 | ≥5000                                                     | 5000                                | 364.2                          |
| NFE2L3    | 5000                                | ≥5000                            | ≥5000                                 | ≤1                                | 578.8                                                 | ≥5000                                                     | ≥5000                               | ≥5000                          |
| BACH1     | ≥5000                               | ≥5000 (≥5000, 5000) <sup>1</sup> | 2068.9                                | 160.9                             | 3463.9 (5000, 1927.8) <sup>1</sup>                    | ≥5000                                                     | 43.5 (67.6) <sup>1</sup>            | 87.2 (86.3, 88.0) <sup>1</sup> |
| BACH2     | ≥5000                               | 5000                             | 5000                                  | 16.9                              | 5000                                                  | ≥5000                                                     | 5000                                | 202.2 (5000) <sup>2</sup>      |
| BATF2     | ≥5000 (≥5000, ≥5000) <sup>1</sup>   | ≥5000                            | ≥5000 (≥5000, 5000) <sup>1</sup>      | 5000                              | ≥5000                                                 | ≥5000                                                     | 97.9                                | 24.4                           |
| BATF3     | ≥5000                               | ≥5000                            | ≥5000                                 | 5000                              | 5000                                                  | ≥5000                                                     | 17.4 (8.6, 19.5, 24.2) <sup>1</sup> | 14.4 (13.5) <sup>2</sup>       |
| HLF       | ≥5000                               | 5000.0                           | ≥5000                                 | ≥5000                             | 5000                                                  | ≥5000                                                     | ≥5000                               | ≥5000                          |
| DBP       | ≥5000                               | ≥5000                            | ≥5000                                 | ≥5000                             | ≥5000                                                 | ≥5000                                                     | ≥5000                               | ≥5000                          |
| NFIL3     | ≥5000                               | 5000                             | ≥5000                                 | ≥5000                             | ≥5000                                                 | ≥5000                                                     | 5000                                | 1104.3                         |
| CEBPG     | 40.4 (37.3, 43.5) <sup>1</sup>      | 139.2                            | ≥5000 (≥5000, 5000) <sup>1</sup>      | ≥5000                             | 2355.5                                                | 5000                                                      | 13.5 (6.5, 18.4, 15.5) <sup>1</sup> | 5.4 (3.7, 7.1) <sup>1</sup>    |
| homodimer | 5000                                | ≥5000                            | ≥5000                                 | ≥5000                             | ≥5000                                                 | 112.6                                                     | 85.5                                | 296.6                          |

<sup>1</sup>  $K_d$  from repeated experiments.

<sup>2</sup>  $K_d$  from an experiment where the designed peptide was labeled with the donor fluorophore and the target was labeled with the acceptor.

**Supplemental Table II.** Measured affinities for designed peptides at 23 °C.  $K_d$  units are nanomolar. If repeated experiments were performed, the  $K_d$  listed is the average value and individual replicates are given in parentheses. A  $K_d$  in italics denotes the average with a single outlier removed. A “\*” denotes a fitted  $K_d$  with  $R^2$  value < 0.8.

|           | anti-CREBZF                                            | anti-XBP1                                      | OPTanti-XBP1_A                                 | OPTanti-XBP1_B                                 | anti-ATF6                                                         | OPTanti-ATF6                                                     | anti-FOS                                   | OPTanti-FOS                        |
|-----------|--------------------------------------------------------|------------------------------------------------|------------------------------------------------|------------------------------------------------|-------------------------------------------------------------------|------------------------------------------------------------------|--------------------------------------------|------------------------------------|
| FOS       | 273.9                                                  | 42.6                                           | 210.1                                          | 807.7                                          | $\geq 1000$                                                       | $\geq 1000$                                                      | $\leq 1$ ( $\leq 1$ ) <sup>1</sup>         | $\leq 1$ ( $\leq 1$ ) <sup>1</sup> |
| FOSL1     | 1000.0                                                 | $\geq 1000$ ( $\geq 1000$ , 1000) <sup>1</sup> | 693.5 (386.9, 1000) <sup>1</sup>               | 778.5                                          | $\geq 1000$                                                       | $\geq 1000$                                                      | $\leq 1$                                   | 1.9                                |
| ATF2      | $\geq 1000$                                            | $\geq 1000$ ( $\geq 1000$ , 1000) <sup>1</sup> | 1000                                           | $\geq 1000$                                    | 1000 (1000, 1000) <sup>1</sup>                                    | $\geq 1000$                                                      | 1000 (1000, 1000) <sup>1</sup>             | 65.6                               |
| ATF3      | $\geq 1000$                                            | $\geq 1000$                                    | $\geq 1000$                                    | $\geq 1000$ ( $\geq 1000$ , 1000) <sup>1</sup> | $\geq 1000$                                                       | $\geq 1000$                                                      | 17.1                                       | 28.4 (98.9) <sup>2</sup>           |
| ATF4      | 1000                                                   | $\geq 1000$                                    | $\geq 1000$ (1000, $\geq 1000$ ) <sup>1</sup>  | $\geq 1000$                                    | 970.6 (853.2, 1000, 1000, 1000, 1000) <sup>1</sup>                | 35.2 (302.4, 33.6, 31.5, 40.5) <sup>1</sup>                      | 80.9 (96.9, 64.9) <sup>1</sup>             | 7.6                                |
| ATF6      | 609.3 (527.4, 691.2) <sup>1</sup>                      | $\geq 1000$                                    | 1000 (1000, 1000) <sup>1</sup>                 | $\geq 1000$                                    | 118.3 (5.4, 102.0, 94.4, 147.7, 129.0) <sup>1</sup>               | 3.5 (9.2, 1.6, 1.3, 1.7) <sup>1</sup> (13.5) <sup>2</sup>        | $\geq 1000$                                | $\geq 1000$                        |
| ATF6B     | 134.8                                                  | $\geq 1000$                                    | 13.7 (18.5, 8.9) <sup>1</sup>                  | 86.7                                           | 27.4 (35.2, 20.1, 27.0) <sup>1</sup>                              | $\leq 1$ ( $\leq 1$ , $\leq 1$ ) <sup>1</sup> (2.9) <sup>2</sup> | $\geq 1000$                                | $\geq 1000$                        |
| CREBZF    | 1.4 (1.8, 1) <sup>1</sup>                              | $\geq 1000$                                    | 160.0                                          | 1.1                                            | 1000 (1000) <sup>2</sup>                                          | 11.4 (9.4*, 13.4)                                                | $\geq 1000$                                | $\geq 1000$                        |
| XBP1      | $\geq 1000$                                            | 1000 (1000, 1000) <sup>1</sup>                 | 11 (9.6, 18.2, 5.2) <sup>1</sup>               | 25.1 (28.1, 22.1) <sup>1</sup>                 | 165.8 (139.8, 159.3, 197.2, 153.0, 179.9) <sup>1</sup>            | 3.4 (10.2, 1, 1.2, $\leq 1$ ) <sup>1</sup> (5.4) <sup>2</sup>    | $\geq 1000$                                | 835.1                              |
| JUN       | 75.4 (84.2, 66.5) <sup>1</sup>                         | 324.5                                          | 128.6 (150.5, 106.6) <sup>1</sup>              | 238.2*                                         | $\geq 1000$ (1000, 1000, $\geq 1000$ , $\geq 1000$ ) <sup>1</sup> | $\geq 1000$                                                      | 16.5                                       | 4.9                                |
| JUNB      | 1000                                                   | $\geq 1000$                                    | 867.5                                          | $\leq 1$ ( $\leq 1$ , $\leq 1$ ) <sup>1</sup>  | $\geq 1000$                                                       | $\geq 1000$                                                      | $\geq 1000$                                | >1000                              |
| MAFF      | $\geq 1000$                                            | $\geq 1000$                                    | 457.6                                          | $\geq 1000$                                    | 1000                                                              | $\geq 1000$                                                      | 39.7                                       | 9.6                                |
| MAFG      | 1000                                                   | $\geq 1000$                                    | 476.3                                          | $\leq 1$                                       | $\geq 1000$ ( $\geq 1000$ , 1000) <sup>1</sup>                    | $\geq 1000$                                                      | 5.8                                        | 71.8* (104.6) <sup>2</sup>         |
| MAF       | $\geq 1000$                                            | 1000                                           | $\geq 1000$                                    | $\geq 1000$                                    | $\geq 1000$                                                       | $\geq 1000$                                                      | 28.2                                       | 11.1                               |
| MAFB      | $\geq 1000$                                            | 1000                                           | $\geq 1000$                                    | $\geq 1000$                                    | 1000                                                              | $\geq 1000$                                                      | 84.4                                       | 15.7                               |
| CREB1     | $\geq 1000$                                            | $\geq 1000$                                    | 1000                                           | $\geq 1000$                                    | $\geq 1000$                                                       | $\geq 1000$                                                      | $\geq 1000$                                | 22.2                               |
| CREB3     | $\geq 1000$                                            | $\geq 1000$                                    | $\geq 1000$                                    | $\geq 1000$                                    | $\geq 1000$                                                       | $\geq 1000$                                                      | $\geq 1000$                                | $\geq 1000$                        |
| CREB3L1   | $\geq 1000$                                            | 966.8                                          | $\geq 1000$                                    | $\geq 1000$                                    | $\geq 1000$                                                       | $\geq 1000$                                                      | $\geq 1000$                                | $\geq 1000$                        |
| CREB3L3   | $\geq 1000$                                            | 1000                                           | $\geq 1000$                                    | $\geq 1000$                                    | 1000                                                              | $\geq 1000$                                                      | 1000 ( $\leq 1$ , 1000, 1000) <sup>1</sup> | $\geq 1000$                        |
| NFE2      | 124.7                                                  | 1000                                           | $\geq 1000$                                    | 3.4                                            | 1000                                                              | $\geq 1000$                                                      | $\geq 1000$                                | $\geq 1000$                        |
| NFE2L1    | 1000 (1000, 1000) <sup>1</sup>                         | $\geq 1000$                                    | 766.8                                          | $\leq 1$                                       | 902.1 (706.3, 1000, 1000) <sup>1</sup>                            | $\geq 1000$                                                      | $\geq 1000$                                | $\geq 1000$                        |
| NFE2L2    | 539.2                                                  | $\geq 1000$                                    | $\geq 1000$                                    | $\geq 1000$                                    | $\geq 1000$                                                       | $\geq 1000$                                                      | 1000                                       | 453.8                              |
| NFE2L3    | 1000.0                                                 | $\geq 1000$                                    | $\geq 1000$                                    | $\leq 1$                                       | 1000                                                              | $\geq 1000$                                                      | $\geq 1000$                                | $\geq 1000$                        |
| BACH1     | $\geq 1000$                                            | $\geq 1000$ ( $\geq 1000$ , 1000) <sup>1</sup> | 235.8                                          | 70.7                                           | 838.1 ( $\geq 1000$ , 676.7) <sup>1</sup>                         | $\geq 1000$                                                      | 4.5 (9.8) <sup>1</sup>                     | 17.1 (22.7) <sup>1</sup>           |
| BACH2     | 1000                                                   | $\geq 1000$                                    | 283.3                                          | 4.8                                            | $\geq 1000$                                                       | $\geq 1000$                                                      | 1000                                       | 72.0 (263.6) <sup>2</sup>          |
| BAIF2     | $\geq 1000$ ( $\geq 1000$ , $\geq 1000$ ) <sup>1</sup> | $\geq 1000$                                    | 935.2 (1000, 870.4) <sup>1</sup>               | 1000                                           | $\geq 1000$                                                       | $\geq 1000$                                                      | 15.0                                       | 6.5                                |
| BAIF3     | 1000                                                   | $\geq 1000$                                    | 485.9                                          | 1000                                           | $\geq 1000$                                                       | $\geq 1000$                                                      | 3.0 (74.4, 2.8, 3.2) <sup>1</sup>          | 7.1 (4.6) <sup>2</sup>             |
| HLF       | $\geq 1000$                                            | $\geq 1000$                                    | $\geq 1000$                                    | $\geq 1000$                                    | 1000                                                              | $\geq 1000$                                                      | $\geq 1000$                                | $\geq 1000$                        |
| DBP       | $\geq 1000$                                            | $\geq 1000$                                    | $\geq 1000$                                    | $\geq 1000$                                    | $\geq 1000$                                                       | $\geq 1000$                                                      | $\geq 1000$                                | 1000                               |
| NFIL3     | $\geq 1000$                                            | $\geq 1000$                                    | $\geq 1000$                                    | $\geq 1000$                                    | $\geq 1000$                                                       | $\geq 1000$                                                      | 1000                                       | 128.3                              |
| CEBPG     | 8.6 (9.5, 7.6) <sup>1</sup>                            | 413.0                                          | $\geq 1000$ ( $\geq 1000$ , 1000) <sup>1</sup> | $\geq 1000$                                    | 1000                                                              | 26.7                                                             | 2.1 (1.3, 2.5, 2.5) <sup>1</sup>           | $\leq 1$ (1.1) <sup>1</sup>        |
| homodimer | 420.4                                                  | $\geq 1000$                                    | $\geq 1000$                                    | $\geq 1000$                                    | $\geq 1000$                                                       | 9.7                                                              | 15.8                                       | 59.3                               |

<sup>1</sup>  $K_d$  from repeated experiments.

<sup>2</sup>  $K_d$  from an experiment where the designed peptide was labeled with the donor fluorophore and the target was labeled with the acceptor.

**Supplemental Table III.** Measured affinities for designed peptides at 4 °C.  $K_d$  units are nanomolar. If repeated experiments were performed, the  $K_d$  listed is the average value and individual replicates are given in parentheses. A  $K_d$  in italics denotes the average with a single outlier removed. A “\*” denotes a fitted  $K_d$  with  $R^2$  value < 0.8.

|           | anti-CREBZF                       | anti-XBP1                         | OPTanti-XBP1_A                       | OPTanti-XBP1_B                   | anti-ATF6                                       | OPTanti-ATF6                                           | anti-FOS                              | OPTanti-FOS               |
|-----------|-----------------------------------|-----------------------------------|--------------------------------------|----------------------------------|-------------------------------------------------|--------------------------------------------------------|---------------------------------------|---------------------------|
| FOS       | 27.2                              | 48.1                              | 12.5                                 | 59.9                             | ≥1000                                           | ≥1000                                                  | ≤1 (≤1) <sup>1</sup>                  | ≤1 (≤1) <sup>1</sup>      |
| FOSL1     | 98.7                              | ≥1000 (1000, 1000) <sup>1</sup>   | 15.1 (11.0, 19.1) <sup>1</sup>       | 39.5                             | ≥1000                                           | ≥1000                                                  | 2.2                                   | 1.7                       |
| ATF2      | ≥1000                             | ≥1000 (1000, 1000) <sup>1</sup>   | 128.9                                | 445.6                            | 163.3 (141.7) <sup>1</sup>                      | ≥1000                                                  | 1000 (1000,1000) <sup>1</sup>         | 13.0                      |
| ATF3      | ≥1000                             | ≥1000                             | 1000                                 | ≥1000 (≥1000, 1000) <sup>1</sup> | ≥1000                                           | ≥1000                                                  | 12.6                                  | 16.0* (16.6) <sup>2</sup> |
| ATF4      | 1000                              | ≥1000                             | 67.9 (80.1, 55.6) <sup>1</sup>       | ≥1000                            | 10.0 (5.3, 13.9, 8.3, 11.3, 11.2) <sup>1</sup>  | 12.4 (96.2, 11.9, 10.0, 15.4) <sup>1</sup>             | 21.0 (16.0) <sup>1</sup>              | 1.4                       |
| ATF6      | 154.7 (118.9, 190.4) <sup>1</sup> | ≥1000                             | 74.0 (78.9, 87.6, 55.6) <sup>1</sup> | ≥1000                            | 15.2 (≤1, 12.6, 14.6, 20.3, 13.2) <sup>1</sup>  | 1.3 (≤1, 1.1, 1.6, 1.5) <sup>1</sup> (≤1) <sup>2</sup> | 1000                                  | ≥1000                     |
| ATF6B     | 1000                              | ≥1000                             | 22.8 (30.3, 15.2) <sup>1</sup>       | 167.6                            | 38.6 (37.2, 39.8, 38.9) <sup>1</sup>            | 1.0 (≤1, 1.1, ≤1) <sup>1</sup> (≤1) <sup>2</sup>       | ≥1000                                 | ≥1000                     |
| CREBZF    | 1.5 (1.9, ≤1) <sup>1</sup>        | ≥1000                             | 14.2                                 | ≤1                               | 43.6 (1000) <sup>2</sup>                        | 2.7 (≤1, 4.4) <sup>1</sup>                             | ≥1000                                 | ≥1000                     |
| XBP1      | 1000                              | 449.8 (415.7, 483.9) <sup>1</sup> | 3.7 (2.9, 6.9, 1.3) <sup>1</sup>     | 5.6 (5.5, 5.6) <sup>1</sup>      | 35.9 (≤1, 41.4, 40.9, 31.2, 30.1) <sup>1</sup>  | 1.1 (≤1, ≤1, 1.2, ≤1) <sup>1</sup> (≤1) <sup>2</sup>   | ≥1000                                 | 35.3                      |
| JUN       | 6.4 (8.6, 4.2) <sup>1</sup>       | 1000                              | 3 (4.9, 1.1) <sup>1</sup>            | 1.6                              | 276.1 (218.4, 276.1, 251.2, 358.8) <sup>1</sup> | ≥1000                                                  | 4.9                                   | ≤1                        |
| JUNB      | 44.3                              | 69.1                              | 9.2                                  | 1.3 (1.5, ≤1) <sup>1</sup>       | ≥1000                                           | ≥1000                                                  | 12.9*                                 | 7.6*                      |
| MAFF      | ≥1000                             | ≥1000                             | 47.1                                 | ≥1000                            | 102.6                                           | ≥1000                                                  | 18.4                                  | 2.4                       |
| MAFG      | 1000                              | ≥1000                             | 53.2                                 | ≤1                               | 722.4 (444.7, 1000) <sup>1</sup>                | ≥1000                                                  | 5.7                                   | 28.4* (31.9) <sup>2</sup> |
| MAF       | ≥1000                             | ≥1000                             | 35.2*                                | 691.5                            | 94.5                                            | ≥1000                                                  | 44.0                                  | 4.3                       |
| MAFB      | ≥1000                             | ≥1000                             | ≥1000                                | ≥1000                            | 195.6                                           | ≥1000                                                  | 21.2                                  | 2.9                       |
| CREB1     | ≥1000                             | ≥1000                             | 135.0                                | ≥1000                            | 635.1                                           | ≥1000                                                  | ≥1000                                 | 18.5*                     |
| CREB3     | ≥1000                             | ≥1000                             | 520.9                                | ≥1000                            | 520.7                                           | ≥1000                                                  | ≤1                                    | ≥1000                     |
| CREB3L1   | ≥1000                             | ≥1000                             | ≥1000                                | ≥1000                            | 1000                                            | ≥1000                                                  | ≥1000                                 | ≥1000                     |
| CREB3L3   | ≥1000                             | 378.9                             | ≥1000                                | ≤1                               | 104.8                                           | ≥1000                                                  | ≥1000 (≤1, ≥1000, ≥1000) <sup>1</sup> | ≥1000                     |
| NFE2      | 6.8                               | 1000                              | 293.9                                | 1.5                              | ≥1000                                           | ≥1000                                                  | ≥1000                                 | ≥1000                     |
| NFE2L1    | 1000 (1000, 1000) <sup>1</sup>    | ≥1000                             | 96.1                                 | ≤1                               | ≥1000 (1000, ≥1000, 1000) <sup>1</sup>          | ≥1000                                                  | 1000                                  | ≥1000                     |
| NFE2L2    | 25.0                              | ≥1000                             | ≥1000                                | ≥1000                            | ≥1000                                           | ≥1000                                                  | ≥1000                                 | 1000                      |
| NFE2L3    | ≥1000                             | ≥1000                             | 564.3                                | ≤1                               | 1000                                            | ≥1000                                                  | ≥1000                                 | ≥1000                     |
| BACH1     | 1000                              | 1000 (1000, 1000) <sup>1</sup>    | 16.3                                 | 5.1                              | 1000 (1000, 1000) <sup>1</sup>                  | ≥1000                                                  | 1.6 (3.2) <sup>1</sup>                | 7.3 (6.7) <sup>1</sup>    |
| BACH2     | 42.4                              | 338.0                             | 6.2                                  | 3.7                              | 416.8                                           | ≥1000                                                  | 83.9                                  | 8.1 (13.4) <sup>2</sup>   |
| BAIF2     | 1000 (1000, 1000) <sup>1</sup>    | ≥1000                             | 168.2 (192.0, 144.4) <sup>1</sup>    | ≥1000                            | ≥1000                                           | ≥1000                                                  | 1.9                                   | 1.3                       |
| BAIF3     | 1000                              | ≥1000                             | 21.5                                 | 115.0                            | ≥1000                                           | ≥1000                                                  | 1.4 (1.4, 1.4, 1.5)                   | 5.0 (1.7) <sup>2</sup>    |
| HLF       | ≥1000                             | ≥1000                             | ≥1000                                | 509.9*                           | 158.9                                           | ≥1000                                                  | ≥1000                                 | ≥1000                     |
| DBP       | ≥1000                             | ≥1000                             | ≥1000                                | ≥1000                            | 112.2                                           | ≥1000                                                  | ≥1000                                 | ≥1000                     |
| NFIL3     | ≥1000                             | ≥1000                             | 1000                                 | ≥1000                            | 1000                                            | ≥1000                                                  | 583.5                                 | 15.1                      |
| CEBPG     | 2.5 (2.9, 2.0) <sup>1</sup>       | 1000                              | ≥1000 (≥1000, 1000) <sup>1</sup>     | ≥1000                            | 253.8                                           | 4.2*                                                   | 1.5 (≤1, 1.9, 1.7) <sup>1</sup>       | ≤1 (≤1) <sup>1</sup>      |
| homodimer | 16.1                              | ≥1000                             | ≥1000                                | ≥1000                            | 1000                                            | ≤1                                                     | 14.3                                  | 8.8                       |

<sup>1</sup>  $K_d$  from repeated experiments.

<sup>2</sup>  $K_d$  from an experiment where the designed peptide was labeled with the donor fluorophore and the target was labeled with the acceptor.

**Supplemental Table IV.** Measured affinities for OPTanti-XBP1\_A at 37, 23, and 4 °C

in 0.4 M KCl.  $K_d$  units are nanomolar.

|               | <b>37 °C</b> | <b>23 °C</b> | <b>4 °C</b> |
|---------------|--------------|--------------|-------------|
| <b>XBP1</b>   | 98.8         | 6.6          | 2.0         |
| <b>ATF6B</b>  | 64.0         | 15.4         | 17.6        |
| <b>CREBZF</b> | 1028.8       | 20.0         | 12.7        |
| <b>BACH1</b>  | 1075.3       | 140.5        | 9.6         |
| <b>BACH2</b>  | 1623.1       | 92.3         | 2.2         |
| <b>FOS</b>    | $\geq 5000$  | 279.9        | 14.4        |
| <b>JUNB</b>   | $\geq 5000$  | 258.5        | 1.5         |
| <b>MAFG</b>   | 1539.9       | 255.5        | 24.0        |
| <b>NFE2</b>   | $\geq 5000$  | $\geq 1000$  | $\geq 1000$ |
| <b>NFE2L1</b> | $\geq 5000$  | $\geq 1000$  | $\geq 1000$ |
| <b>NFE2L3</b> | $\geq 5000$  | $\geq 1000$  | $\geq 1000$ |

**Supplemental Table V.** Measured affinities for OPTanti-XBP1\_B at 37, 23, and 4 °C in

0.4 M KCl.  $K_d$  units are nanomolar.

|               | <b>37 °C</b> | <b>23 °C</b> | <b>4 °C</b> |
|---------------|--------------|--------------|-------------|
| <b>XBP1</b>   | 145.6        | 6.1          | 1.6         |
| <b>ATF6B</b>  | 99.9         | 24.5         | 31.6        |
| <b>CREBZF</b> | 3852.4       | 29.5         | 17.8        |
| <b>BACH1</b>  | $\geq 5000$  | 199.1        | 7.8         |
| <b>BACH2</b>  | 3253.6       | 118.2        | 4.4         |
| <b>FOS</b>    | $\geq 5000$  | 271.8        | 9.7         |
| <b>JUNB</b>   | $\geq 5000$  | 137.9        | 1.0         |
| <b>MAFG</b>   | $\geq 5000$  | 223.9        | 17.8        |
| <b>NFE2</b>   | $\geq 5000$  | $\geq 1000$  | $\geq 1000$ |
| <b>NFE2L1</b> | $\geq 5000$  | $\geq 1000$  | $\geq 1000$ |
| <b>NFE2L3</b> | $\geq 5000$  | $\geq 1000$  | $\geq 1000$ |

**Supplemental Table VI.** Measured affinities for OPTanti-XBP1<sub>B</sub>-GLN at 37, 23, and 4 °C.  $K_d$  units are nanomolar.

|               | <b>37 °C</b> | <b>23 °C</b> | <b>4 °C</b> |
|---------------|--------------|--------------|-------------|
| <b>XBP1</b>   | 93.7         | 6.5          | 1.6         |
| <b>ATF6B</b>  | 109.5        | 26.1         | 34.2        |
| <b>CREBZF</b> | ≥5000        | 76.7         | 11.1        |
| <b>BACH1</b>  | ≥5000        | 331.6        | 11.7        |
| <b>BACH2</b>  | ≥5000        | 323.5        | 33.5        |
| <b>FOS</b>    | 1354.5       | 153.5        | 6.9         |
| <b>JUNB</b>   | 54.5         | 182.8        | 2.2         |
| <b>MAFG</b>   | 1721.9       | 670.2        | 54.0        |
| <b>NFE2</b>   | ≥5000        | ≥1000        | ≥1000       |
| <b>NFE2L1</b> | ≥5000        | ≥1000        | ≥1000       |
| <b>NFE2L3</b> | ≥5000        | ≥1000        | ≥1000       |

**Supplemental Table VII.** Measured affinities for anti-FOS at 37, 23, and 4 °C in buffer with 3 M urea.  $K_d$  units are nanomolar. If repeated experiments were performed, the  $K_d$  listed is the average. A  $K_d$  in italics denotes the average with an outlier removed. A “\*” denotes a fitted  $K_d$  with  $R^2$  value < 0.8.

|              | <b>37 °C</b>                                           | <b>23 °C</b>                              | <b>4 °C</b>                           |
|--------------|--------------------------------------------------------|-------------------------------------------|---------------------------------------|
| <b>FOS</b>   | 259.1 (30.2*, 164.3, 193.4, 298.1, 380.7) <sup>1</sup> | 33.4 (6.3, 16.7, 36.5, 46.9) <sup>1</sup> | 4.8 (1.8, 3.5, 6.5, 7.4) <sup>1</sup> |
| <b>BATF3</b> | ≥5000                                                  | ≥1000                                     | 727.9                                 |
| <b>BACH1</b> | ≥5000                                                  | ≥1000                                     | ≥1000                                 |
| <b>CEBPG</b> | ≥5000                                                  | 939.4                                     | 212.3                                 |

<sup>1</sup>  $K_d$  from repeated experiments.

**Supplemental Table VIII.** Measured affinities for OPTanti-FOS at 37, 23, and 4 °C in buffer with 3 M urea.  $K_d$  units are nanomolar. If repeated experiments were performed, the  $K_d$  listed is the average.

|              | <b>37 °C</b>                         | <b>23 °C</b>                     | <b>4 °C</b>                      |
|--------------|--------------------------------------|----------------------------------|----------------------------------|
| <b>FOS</b>   | 19.8 (11.6, 23.0, 24.8) <sup>1</sup> | 3.0 (2.0, 3.4, 3.6) <sup>1</sup> | 1.1 (1.0, 1.2, 1.0) <sup>1</sup> |
| <b>BATF3</b> | 5000                                 | ≥1000                            | 150.9                            |
| <b>BACH1</b> | 5000                                 | ≥1000                            | ≥1000                            |
| <b>CEBPG</b> | 5000                                 | 1000                             | 542.1                            |

<sup>1</sup>  $K_d$  from repeated experiments.

**Supplemental Table IX.** Fitted masses of design-target complexes from analytical ultracentrifugation.

| <b>design</b>  | <b>target</b> | <b>Expected<br/>Mass</b> | <b>Fitted<br/>Mass</b> | <b>Ratio<br/>Fitted:Expected</b> | <b>Fit<br/>RMSD<sup>1</sup></b> |
|----------------|---------------|--------------------------|------------------------|----------------------------------|---------------------------------|
| anti-CREBZF    | CREBZF        | 15265.1                  | 15465.3                | 1.0                              | 0.015                           |
| OPTanti-XBP1_A | XBP1          | 14636.6                  | 14846.7                | 1.0                              | 0.021                           |
| OPTanti-ATF6   | ATF6          | 14612.4                  | 15986.2                | 1.1                              | 0.008                           |

<sup>1</sup> RMSD describes the deviation between the experimental data and the fit. The fits reported are for mixtures of 20 μM design peptide + 20 μM coiled-coil target.

**Supplemental Figure 1. CD spectra of the designed peptides anti-XBP1, OPTanti-XBP1\_A, and OPTanti-XBP1\_B.** (A) Scans were performed at 25 °C with 10  $\mu$ M peptide. Helical content calculated by the Baldwin method (1) was determined to be 20% for anti-XBP1, 44.3% for OPTanti-XBP1\_A and 38.3% for OPTanti-XBP1\_B. (B) Scans of OPTanti-XBP1\_B performed at 25 °C and (C) 37 °C.

(A)

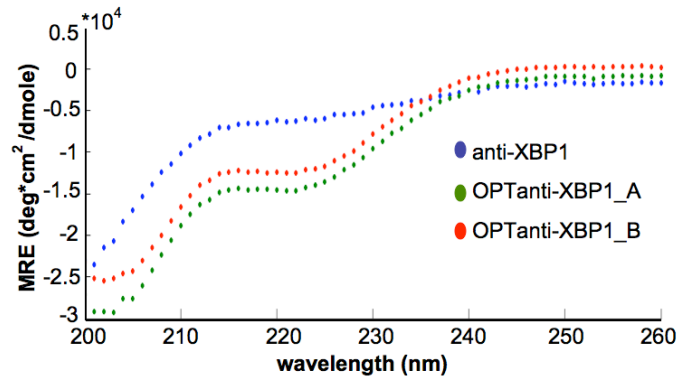

(B)

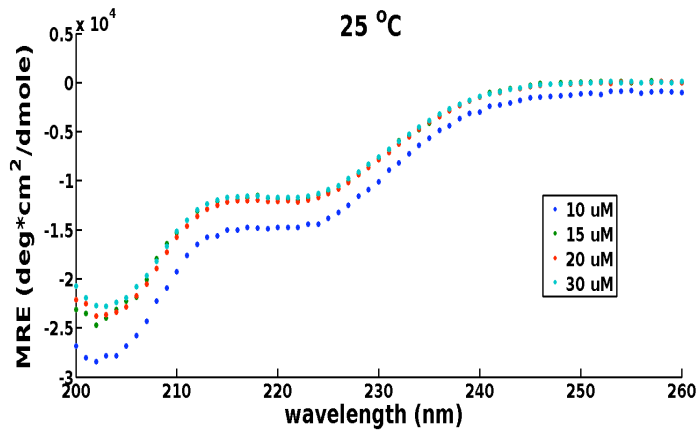

(C)

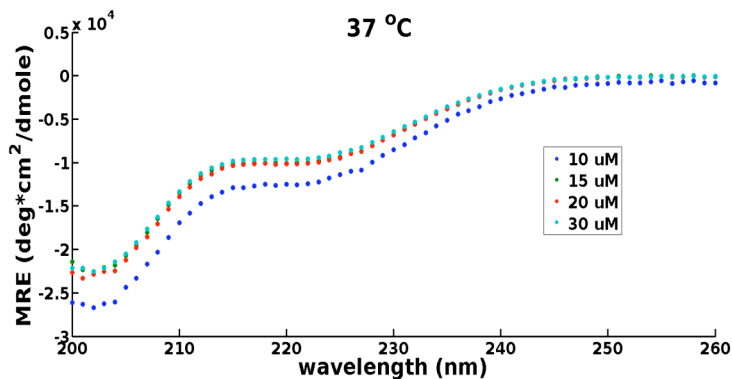

**Supplemental Figure 2. Net charges of bZIPs used in the study.** A histogram showing the distribution of bZIP leucine-zipper domains having a particular net charge.

Underlined bZIPs interacted more tightly with OPTanti-XBP1\_B than with OPTanti-XBP1\_A.

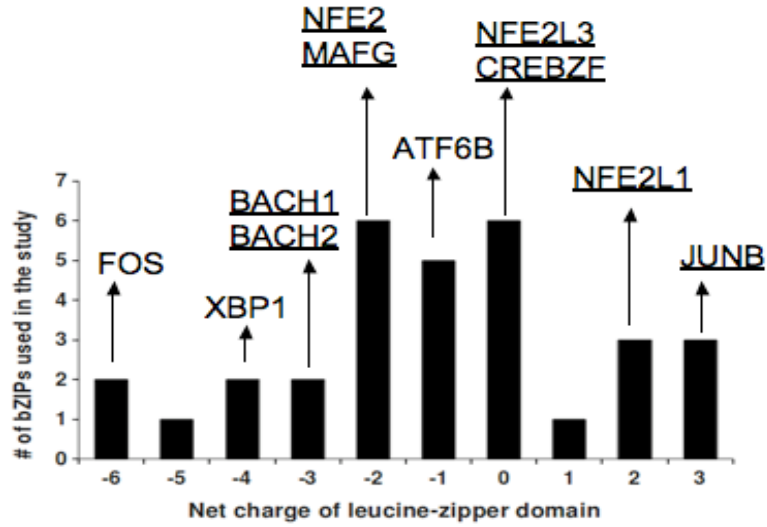



### Supplemental Figure 3. Controls for the anti-FOS and OPTanti-FOS inhibition

**experiments.** (A) Lack of inhibition by anti-FOS and OPTanti-FOS of JUN homodimerization (total JUN concentration 20 nM) in the presence of 40 nM of a consensus AP1 site. (B) Inhibition of FOS-JUN (20 nM total) by anti-FOS and OPTanti-FOS. Lack of a lower baseline and larger fluorescent signal detected at the lowest inhibitor concentrations compared to when DNA is present (Figure 5B) suggests the complex being inhibited in Figure 5b is FOS-JUN bound to DNA.

(A)

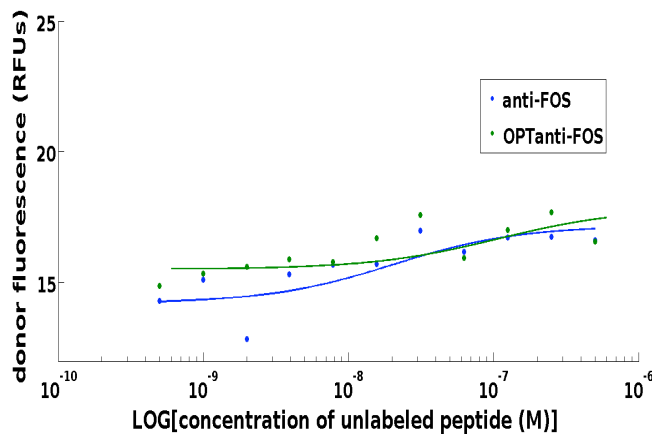

(B)

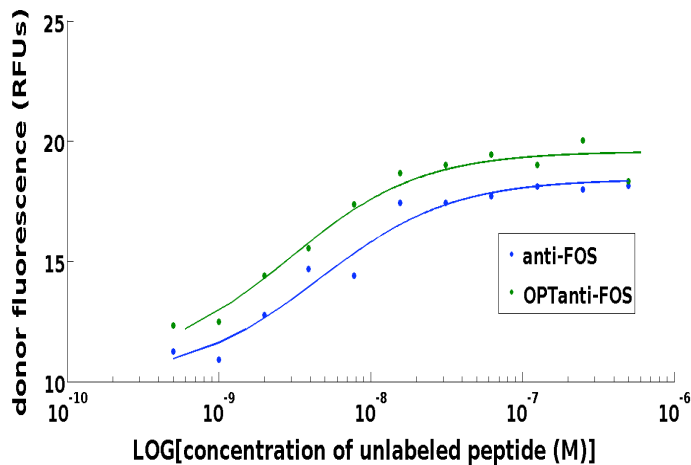

#### References

1. Scholtz JM, Qian H, York EJ, Stewart JM, and Baldwin RL. (1991). Biopolymers 31:1463-1470.
